# Supplementary material
Source: PubMed Central journal article supplement (PMC3007129)
Supplement: JCI39828sd.pdf [file JCI39828sd.pdf]

**Supplemental Table.** Clinical and laboratory features of the patients used as a source of human polyclonal aPL

| Patient | Age | Sex | aCL(>80 LA PGA) | anti-β2GPI | Clinical Features                                                              |
|---------|-----|-----|-----------------|------------|--------------------------------------------------------------------------------|
| 1       | 43  | M   | +               | +          | Arterial thrombosis, digital infarct, leg ulcer                                |
| 2       | 50  | F   | +               | +          | Arterial thrombosis, pregnancy losses, catastrophic APS, myocardial infarction |
| 3       | 57  | M   | +               | +          | Arterial thrombosis, recurrent pulmonary hemorrhage, catastrophic APS          |
| 4       | 36  | F   | +               | +          | Deep venous thrombosis, renal microthrombotic angiopathy, stroke               |

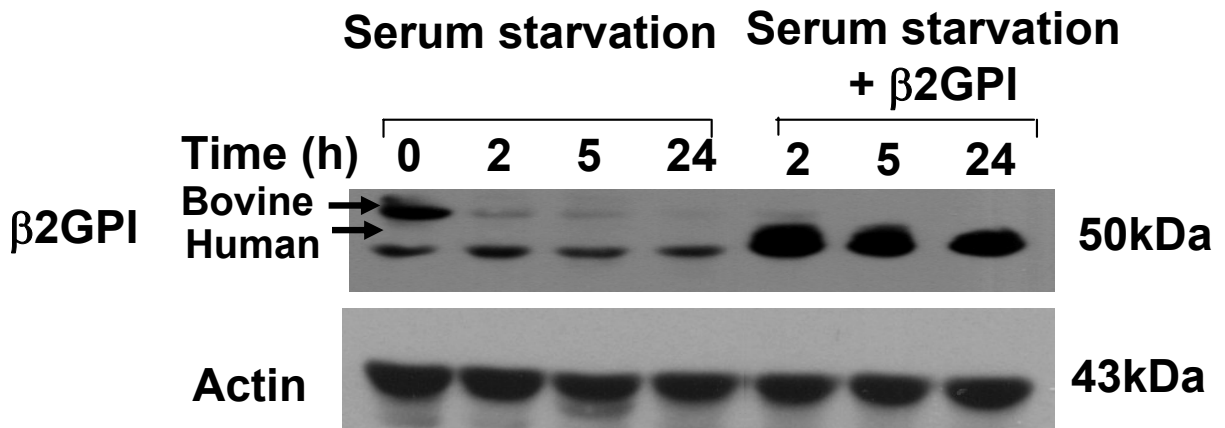

**Supplemental Figure 1: Loss of  $\beta$ 2GPI with serum starvation, and  $\beta$ 2GPI reconstitution.** Bovine aortic endothelial cells (BAEC) were serum starved for 0-24h and harvested, or treated with human  $\beta$ 2GPI (5  $\mu$ g/ml) for 1h after serum starvation for 2-24h. Whole cell lysates were immunoblotted for  $\beta$ 2GPI. Findings shown are representative of 3 independent experiments.

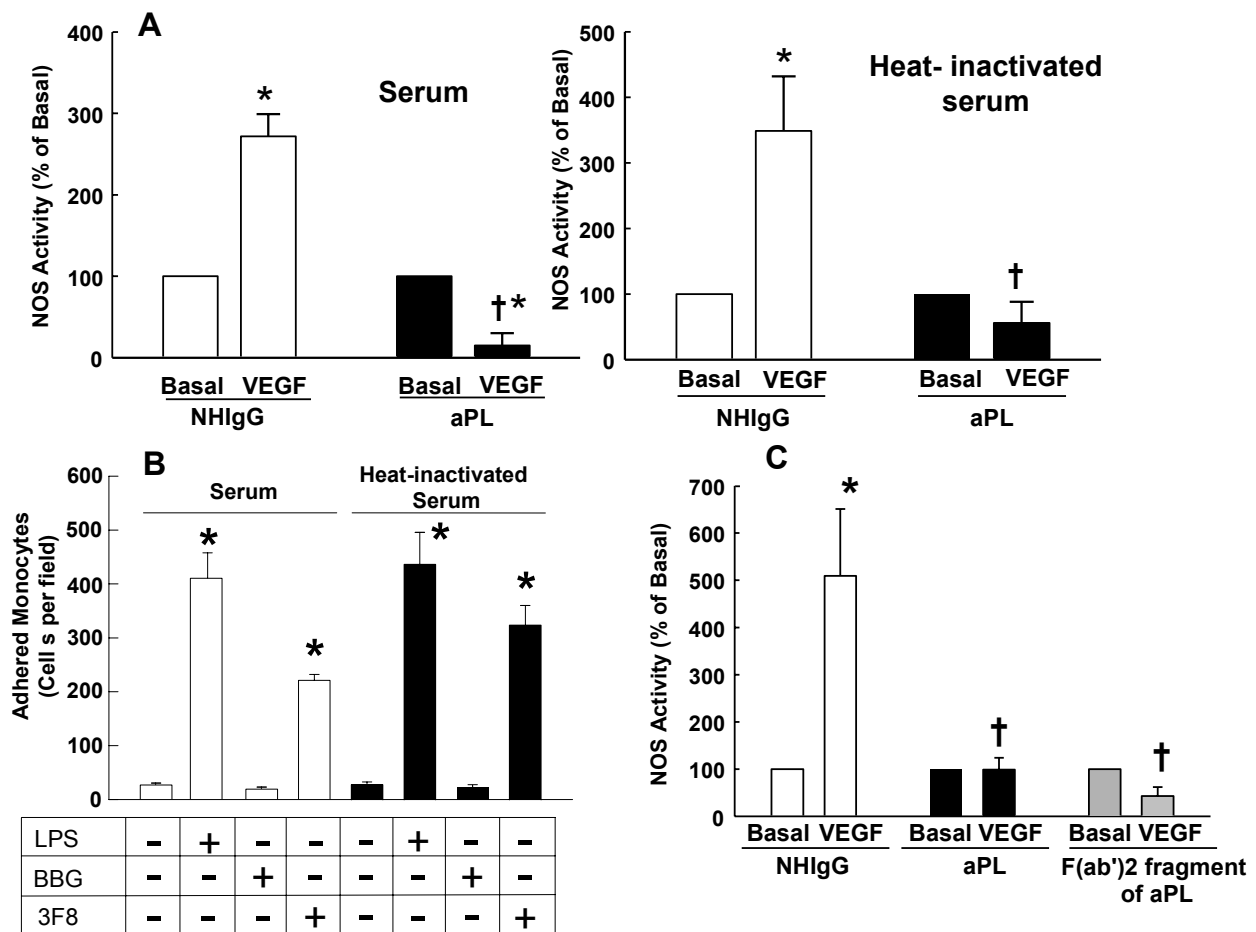

**Supplemental Figure 2: aPL inhibition of eNOS and resulting increase in adhesion occur independent of complement via Fab'.**

(A) BAEC cultured in media containing untreated serum (left panel) or heat-inactivated, complement-free serum (right panel) were pretreated for 15 min with NHlgG or aPL (100  $\mu$ g/ml), and eNOS activity was measured under basal conditions or in the presence of VEGF (100ng/ml) for 15 min. Values are mean $\pm$ SEM, n=4, \*p<0.05 vs basal, †p<0.05 vs. NH IgG. (B) BAEC were cultured in untreated serum or heat-inactivated serum in the presence of vehicle, LPS (100 ng/ml), control IgG (BBG, 10  $\mu$ g/ml) or anti- $\beta$ 2GPI antibody (3F8, 10  $\mu$ g/ml) for 18h, and monocyte adhesion to BAEC was evaluated. Values are mean $\pm$ SEM, n=4, \*p<0.05 vs no treatment. (C) BAEC were pretreated for 15 min with NHlgG, intact aPL, or Fab' fragments of aPL (100  $\mu$ g/ml), and eNOS activity was measured under basal conditions or in the presence of VEGF for 15 min. Values are mean $\pm$ SEM, n=4, \*p<0.05 vs basal, †p<0.05 vs NHlgG.

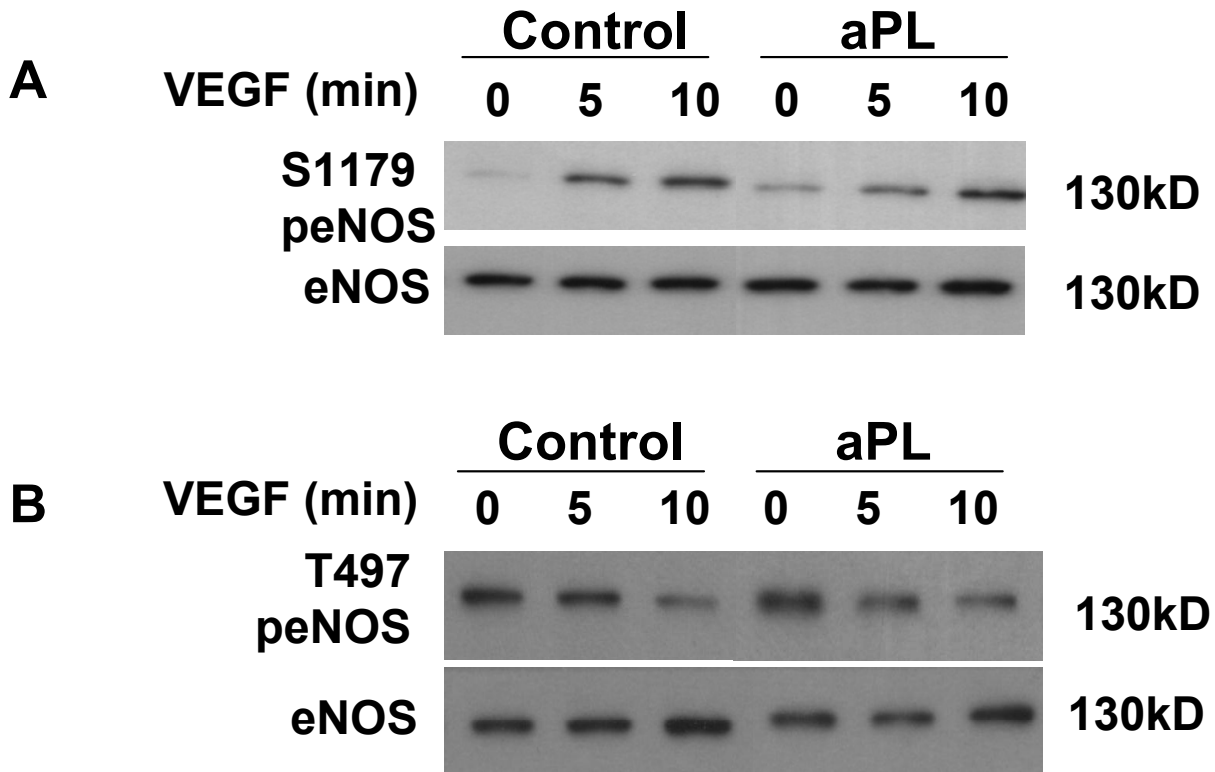

**Supplemental Figure 3: aPL does not alter eNOS S1179 or T497 phosphorylation in the absence of  $\beta$ 2GPI.** BAEC were serum-starved for 24h to remove  $\beta$ 2GPI, pretreated for 15 min with NHIgG or aPL (100  $\mu$ g/ml), and incubated with VEGF (100ng/ml for 0-10 min). Whole cell lysates were prepared and immunoblotted for phospho-eNOS and total eNOS using polyclonal phospho-S1179 eNOS antibody and monoclonal eNOS antibody, respectively (A). Samples were independently immunoblotted for phospho-T497 eNOS and total eNOS (B). Findings shown are representative of 3 independent experiments.

### **Legends for Leukocyte Rolling Videos**

Leukocyte adhesion was determined as described in Materials and Methods. Video 1-4: eNOS<sup>+/+</sup> (**Video 1 and 2**) or eNOS<sup>-/-</sup> (**Video 3 and 4**) mice were injected intraperitoneally with NHIgG (**Video 1 and 3**, 100 µg) or aPL (**Video 2 and 4**, 100 µg), and 24 h later prepared for intravital microscopy. Video 5-8: apoER2<sup>+/+</sup> (**Video 5 and 6**) or apoER2<sup>-/-</sup> (**Video 7 and 8**) mice were injected intraperitoneally with NHIgG (**Video 5 and 7**, 100 µg) or aPL (**Video 6 and 8**, 100 µg), and 24 h later prepared for intravital microscopy. All leukocytes were fluorescence-labeled and the mesentery was exposed for the observation and recording of images of leukocyte adhesion and rolling.
